# Supplementary material for: Evolution of an intron-poor cluster of the CIPK gene family and expression in response to drought stress in soybean
Source: PubMed Central journal article supplement (PMC4911590; doi:10.1038/srep28225), 2016-06-17
Supplement: srep28225-s1.pdf [file srep28225-s1.pdf]

1 **Evolution of an intron-poor cluster of the CIPK gene family and expression in**  
2 **response to drought stress in soybean**

3

4 Kaikai Zhu, Fei Chen, Jinyi Liu, Xinlu Chen, Tarek Hewezi, Zong-Ming (Max)  
5 Cheng\*

6

7 Department of Plant Sciences, University of Tennessee, Knoxville, Tennessee 37996,  
8 USA

9 \*Corresponding author: zcheng@utk.edu

10

11 **Supplementary information**

12 **Figure S1.** Schematic diagram presentation of predicted motifs in the 52 soybean  
13 CIPK proteins.

14 **Figure S2.** Drought treatment affected the growth of soybean seedlings and soil water  
15 content.

16 **Table S1.** List of primer sequences used in qRT-PCR assays.

17 Figure S1

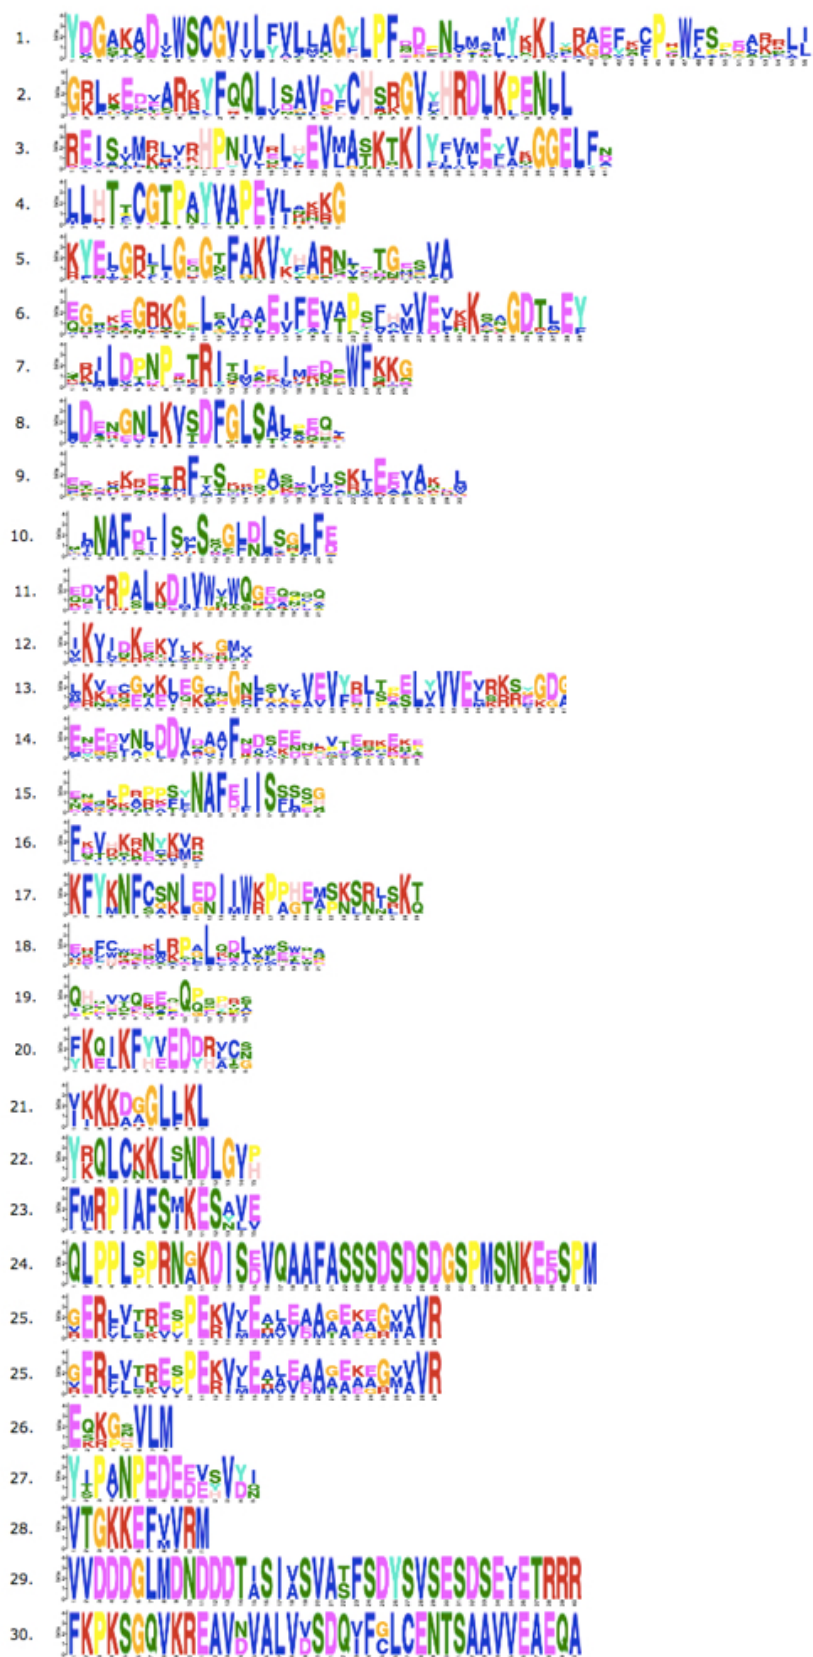

18 Figure S1. Schematic diagram presentation of predicted motifs in the 52 soybean

19 **CIPK proteins.** Motif prediction was performed using the MEME software suite.

20 Figure S2

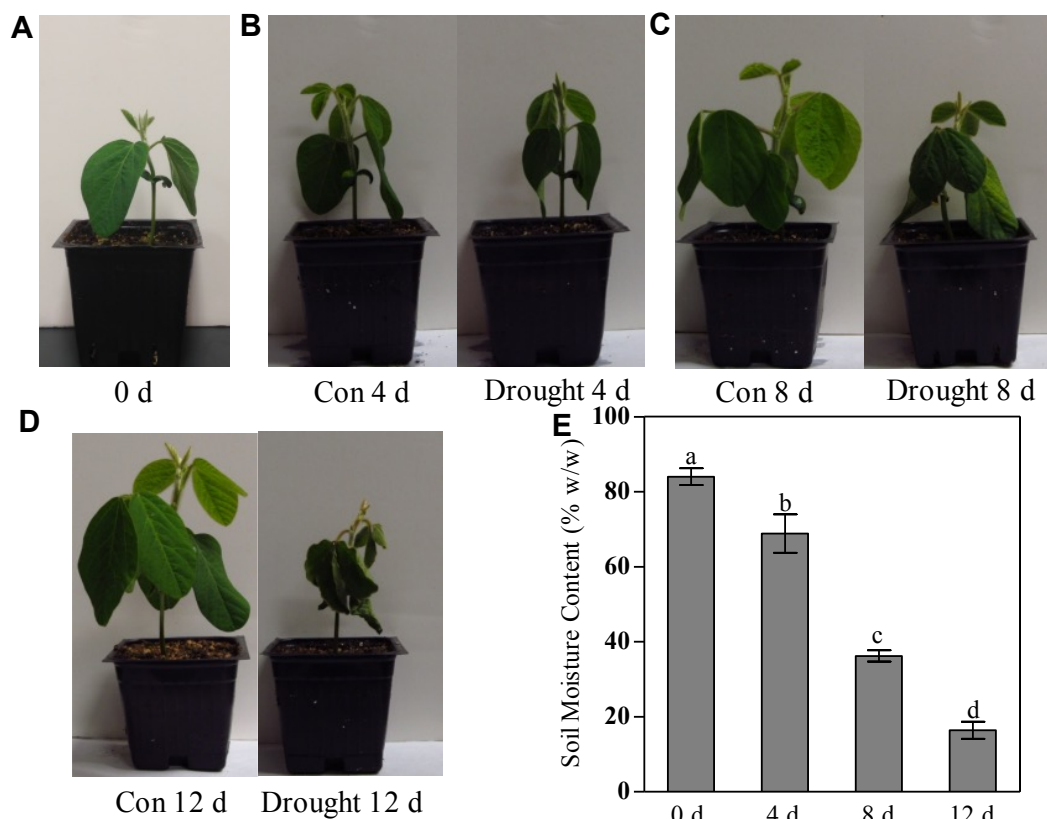

21 **Figure S2. Drought treatment affected the growth of soybean seedlings and soil**  
22 **water content.** Fifteen-day-old soybean seedlings were imposed to drought stress by  
23 withholding water for 0 (control, A), 4 (B), 8 (C), and 12 (D) days. (E) Soil moisture  
24 content at 0, 4, 8 and 12 day post drought application. Values are means  $\pm$  SE of three  
25 independent experiments, each with three replicates. Bars with different letters signify  
26 statistically significant differences at  $P < 0.05$  according to Duncan's multiple range  
27 tests.  
28

29 **Table S1.** List of primer sequences used in qRT-PCR assays.

| Gene             | Sequence                  |
|------------------|---------------------------|
| <i>GmCIPK2F</i>  | GGAGGTCAAGAAGGACAATG      |
| <i>GmCIPK2R</i>  | TGGGAGGAATTCCAGAAGA       |
| <i>GmCIPK4F</i>  | GGTGGAGGTGAAGAAATCAA      |
| <i>GmCIPK4R</i>  | CTTGCCAAACCCAAACAAC       |
| <i>GmCIPK8F</i>  | TCTTACTACTGCTCGACTTAGA    |
| <i>GmCIPK8R</i>  | CCCTAGAGGTTGCTTAATTCTT    |
| <i>GmCIPK9F</i>  | AATACGCCAAGTTCTGTGAG      |
| <i>GmCIPK9R</i>  | CCCTGACTTGCTCTTTCAC       |
| <i>GmCIPK11F</i> | GGTGAATCAAAGTTCTGAATGTC   |
| <i>GmCIPK11R</i> | GTCATTCTCCTGCTACCTTAAT    |
| <i>GmCIPK12F</i> | CTCGAATATGACAGATGGGAAC    |
| <i>GmCIPK12R</i> | GGATGCTTGGAGCTGTATTT      |
| <i>GmCIPK14F</i> | TTGTGACGGTGTTTGATTTG      |
| <i>GmCIPK14R</i> | CCAGCCAACTGAAACTCTAA      |
| <i>GmCIPK20F</i> | TCTCCGTACGAAGTACAGTC      |
| <i>GmCIPK20R</i> | ATCCTCCAATACCCACTCTT      |
| <i>GmCIPK22F</i> | GATTTGGAAGAGCCGGTATC      |
| <i>GmCIPK22R</i> | ACCCTTGAGTAAACACCAATC     |
| <i>GmCIPK24F</i> | TGTGGTTGAGGTGTTTGAG       |
| <i>GmCIPK24R</i> | CATGCCATGAGAGAACAAGA      |
| <i>GmCIPK28F</i> | GAGAGGTTGAAGCCATTGT       |
| <i>GmCIPK28R</i> | CTCAGGTTCTTGTTCCCTGTT     |
| <i>GmCIPK30F</i> | CTAGCTATCATAATGCAACATACAC |
| <i>GmCIPK30R</i> | TCCTTTCCTTCTCCCAAGA       |
| <i>GmCIPK31F</i> | ATTGCAGGGTGAGTTTGG        |
| <i>GmCIPK31R</i> | CTCCACCACAACCAAAGAA       |
| <i>GmCIPK33F</i> | CACCAGTAACGCAATGGA        |
| <i>GmCIPK33R</i> | AAGCTTGGAGGAGGAAATAAG     |

|                  |                         |
|------------------|-------------------------|
| <i>GmCIPK38F</i> | CCTACTGATGATTGAAGACTGAG |
| <i>GmCIPK38R</i> | GAGAGAGAGAGAGAGAGAAA    |
| <i>GmCIPK41F</i> | CGCCCTGCAAATGAAATC      |
| <i>GmCIPK41R</i> | ACCCTTCCTTCCACTCTTA     |
| <i>GmCIPK47F</i> | TTTGAATGGCTTGGGTTAAATC  |
| <i>GmCIPK47R</i> | CCTTCCAACCTCCATCCATC    |
| <i>GmCIPK49F</i> | CCGGCCTCAATCATAATCTC    |
| <i>GmCIPK49R</i> | TTCCTGCCTTCTTTGGAAC     |
| <i>RSP s20eF</i> | GATGCCCACTAAGGTTCTTC    |
| <i>RSP s20eR</i> | GTGCACACGAAGTTCAAATC    |

---
